# Supplementary material
Source: PubMed Central journal article supplement (PMC3811689)
Supplement: MCB.00221-13_zmb999100156so1.pdf [file MCB.00221-13_zmb999100156so1.pdf]

## SUPPLEMENTAL TABLES

**Table S1.** Primers, Assays-on-demand, and siRNA oligonucleotides used in this study

|      |                     |                         |
|------|---------------------|-------------------------|
| qPCR | m36B4 fw            | TCATCCAGCAGGTGTTTGACA   |
|      | m36B4 rv            | GGCACCGAGGCAACAGTT      |
|      | mLEPTIN fw          | CAAGACCATTGTCACCAGGA    |
|      | mleptin rv          | TGAAGCCCAGGAATGAAGTC    |
|      | mPpar $\gamma_2$ fw | TGGGTGAAACTCTGGGAGATTC  |
|      | mPpar $\gamma_2$ rv | GAGAGGTCCACAGAGCTGATTCC |
|      | mRara fw            | CCAGCACCAAGCTTCCAGTCA   |
|      | mRara rv            | ACTGCTGCTCTGGGTCTCGAT   |
|      | mRarb2 fw           | TGCTCAATCCATCGAGACAC    |
|      | mRarb2 rv           | CTTGTACACCCGAGGAGGAG    |
|      | mCrbp1 fw           | GCGCGCTCGACGTCAAC       |
|      | mCrbp1 rv           | ACGATCTCTTTGTCTGGCTTCAG |
|      | mCyp26a1 fw         | TCTCCAACCTGCACGATTCC    |
|      | mCyp26a1 rv         | CGGCTGAAGGCCTGCAT       |
|      | m+hstra6 fw         | CTGCCTTGGGCTCCTGGTGC    |
|      | m+hstra6 rv         | AGTCAGCCAGAAGGGCCACG    |
|      | mRbp4 fw            | GCAGGAGGAGCTGTGCCTAGA   |
|      | mRbp4 rv            | GGAGGGCCTGCTTTGACAGT    |
|      | mTnfa fw            | TCTACTGAACTTCGGGGTGA    |
|      | mTnfa rv            | AGGGTCTGGGCCATAGAACT    |
|      | mSocs3 fw           | GTTGAGCGTCAAGACCCAGT    |
|      | mSocs3 rv           | GGTCACTCTGCAGCGAAAAG    |

|              |                     |                                                     |
|--------------|---------------------|-----------------------------------------------------|
|              | maP2 fw             | TGGAAGACAGCTCCTCCTCG                                |
|              | maP2 rv             | AATCCCCATTTACGCTGATGATC                             |
|              | mPref-1 fw          | GCTGGGACGGGAAATTCTG                                 |
|              | mPref-1 rv          | TCCAGGTCCACGCAAGTTC                                 |
|              | mThbs2 fw           | AGAGTCACTTCAGGGGCTTG                                |
|              | mThbs2 rv           | GCTGTGTTGACAGCCTTTCTT                               |
|              | mGata2 fw           | GCTTCACCCCTAAGCAGAGA                                |
|              | mGata2 rv           | CAGAGAGGGGTGGCTGTG                                  |
|              | mPpar $\gamma_1$ fw | AGAAGCGGTGAACCACTGATATTC                            |
|              | mPpar $\gamma_1$ rv | AGAGGTCCACAGAGCTGATTCC                              |
|              | mSmad3 fw           | CCCCAGAGCAATATTCCAGA                                |
|              | mSmad3 rv           | ATGCTGTGGTTCATCTGGTG                                |
|              | mRbpr2 fw           | ACTCCCTGACCTGGTTTGTG                                |
|              | mRbpr2 rv           | GTGAGGGCCAGTAGAAAACG                                |
|              | mAldh1a1 fw         | CTGGCTGACTTAATGGAGAGAGATC                           |
|              | mAldh1a1 rv         | AGTATGCATTGGCAAAGACTTTCC                            |
|              | mHprt fw            | TGCTGACCTGCTGGATTACA                                |
|              | mHprt rv            | TATGTCCCCGTTGACTGAT                                 |
|              | mstra6              | ASSAY ON DEMAND, ABI                                |
|              |                     |                                                     |
| <b>siRNA</b> | Control siRNA       | UAG-CGA-CUA-AAC-ACA-UCA-AUU                         |
|              | stra6 siRNA         | Dharmacon smart pool or UAG-CGA-CUA-AAC-ACA-UCA-AUU |
|              |                     |                                                     |
